# Supplementary material for: Rational design of an essential diagnostics network to support Universal Health Coverage: a modeling analysis
Source: Springer Nature journal article supplement (doi:10.1186/s12913-022-08558-2), 2022-10-01
Supplement: MOESM1 [file 23561726]

Supplementary Figure S1.

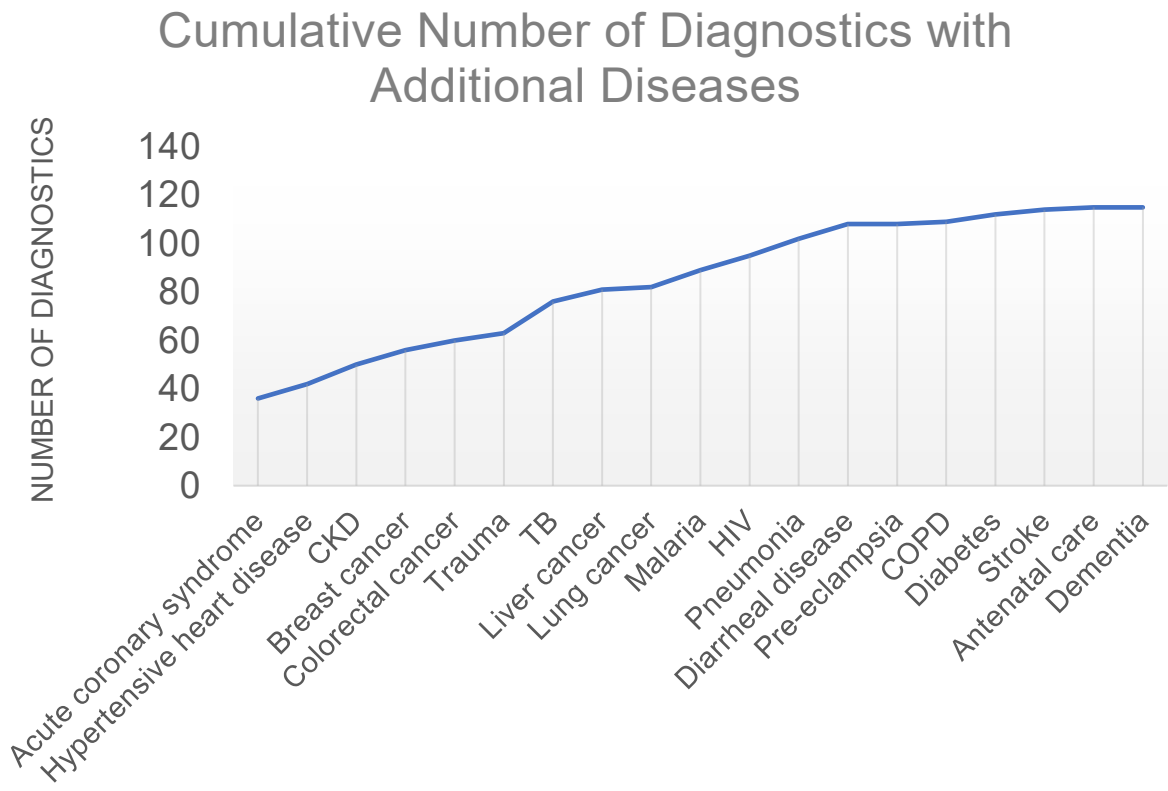

Supplementary Table S1. Definitions of disease levels.

| <b>Condition</b>             | <b>Uncomplicated</b>                                                 | <b>Complicated</b>                                                                                                                                                                                                                                                                                                        |
|------------------------------|----------------------------------------------------------------------|---------------------------------------------------------------------------------------------------------------------------------------------------------------------------------------------------------------------------------------------------------------------------------------------------------------------------|
| Antenatal care               | n/a                                                                  | n/a                                                                                                                                                                                                                                                                                                                       |
| Breast Cancer                | resectable                                                           | non-resectable                                                                                                                                                                                                                                                                                                            |
| Cerebrovascular disease      | all else                                                             | any intervention indicated (thrombolysis, mechanical) volume overload, hyperkalemia, metabolic acidosis, and hyperphosphatemia, uremic encephalopathy, bleeding diathesis, dialysis, transplant                                                                                                                           |
| Chronic kidney disease       | all else                                                             |                                                                                                                                                                                                                                                                                                                           |
| Colorectal cancer            | resectable                                                           | non-resectable                                                                                                                                                                                                                                                                                                            |
| COPD                         | all else                                                             | COPD exacerbation with hypoxemia requiring hospitalization                                                                                                                                                                                                                                                                |
| Dementia                     | all else                                                             | patients with an atypical syndrome (eg, younger patients [ $<60$ years] or those with rapidly progressive dementia)                                                                                                                                                                                                       |
| Diabetes mellitus            | all else                                                             | ketoacidosis, hyperosmolar hyperglycemic state, end-organ disease (wounds, amputation, blindness, renal failure, macrovascular disease)                                                                                                                                                                                   |
| Diarrheal disease            | all else                                                             | severe hypovolemia (altered consciousness, weak pulse); invasive diarrhea that do not respond to empiric antibiotic therapy; bacteremia; particular concern in HIV-infected individuals, hemolytic-uremic syndrome                                                                                                        |
| HIV                          | CD4 $> 200$                                                          | CD4 $< 200$ , aids-defining condition                                                                                                                                                                                                                                                                                     |
| Hypertensive heart disease   | pharmacologic therapy, including common comorbidities                | cardiac resynchronization therapy; advanced heart failure (episodes of refractory fluid retention, hypoperfusion, and/or recurrent malignant ventricular arrhythmias; evidence of severe cardiac dysfunction (on echocardiogram or right heart catheterization); and evidence of severe impairment of exercise capacity.) |
| Ischemic heart disease       | all else                                                             | invasive reperfusion strategy, cardiogenic shock, left heart failure, sustained ventricular tachyarrhythmia.                                                                                                                                                                                                              |
| Liver cancer                 | local                                                                | metastatic                                                                                                                                                                                                                                                                                                                |
| Lower respiratory infections | Mild pneumonia (PSI $< I-II$ )                                       | moderate/severe pneumonia (PSI $IV-V$ );                                                                                                                                                                                                                                                                                  |
| Lung cancer                  | resectable                                                           | non-resectable                                                                                                                                                                                                                                                                                                            |
| Malaria                      | WHO non-severe malaria                                               | WHO severe malaria (anemia, loss of consciousness, etc)                                                                                                                                                                                                                                                                   |
| Preeclampsia, HELLP          | pre-eclampsia without severe features                                | preeclampsia with severe features, HELLP, eclampsia                                                                                                                                                                                                                                                                       |
| Trauma                       | Minor trauma according to a prehospital trauma triage scoring system | major trauma according to a prehospital trauma triage scoring system                                                                                                                                                                                                                                                      |
| Tuberculosis                 | all else                                                             | effusions, hemoptysis, pneumothorax, bronchiectasis, extensive pulmonary destruction (including pulmonary gangrene), fistula, tracheobronchial stenosis, malignancy, and chronic pulmonary aspergillosis                                                                                                                  |

Supplementary Table S2. Mapping medicines to disease levels.

| Condition              | Condition Level | Medicine                    |
|------------------------|-----------------|-----------------------------|
| Ischemic heart disease | triage          | acetylsalicylic acid        |
|                        | uncomplicated   | clopidogrel                 |
|                        |                 | simvastatin                 |
|                        | complicated     | enoxaparin                  |
|                        |                 | heparin sodium              |
|                        |                 | red blood cells             |
| streptokinase          |                 |                             |
|                        | whole blood     |                             |
| Breast cancer          | uncomplicated   | anastrozole                 |
|                        |                 | capecitabine                |
|                        |                 | carboplatin                 |
|                        |                 | cyclophosphamide            |
|                        |                 | doxorubicin                 |
|                        |                 | fluorouracil                |
|                        |                 | leuprorelin                 |
|                        |                 | methotrexate                |
|                        |                 | paclitaxel                  |
|                        |                 | tamoxifen                   |
|                        | trastuzumab     |                             |
|                        | complicated     | filgrastim                  |
|                        |                 | platelets                   |
|                        |                 | red blood cells             |
| whole blood            |                 |                             |
| Chronic kidney disease | uncomplicated   | amlodipine                  |
|                        |                 | bisoprolol                  |
|                        |                 | enalapril                   |
|                        |                 | furosemide                  |
|                        |                 | hydrochlorothiazide         |
|                        |                 | losartan                    |
|                        |                 | spironolactone              |
|                        | verapamil       |                             |
|                        | complicated     | red blood cells             |
|                        |                 | whole blood                 |
|                        |                 |                             |
| Colorectal cancer      | uncomplicated   | capecitabine                |
|                        |                 | fluorouracil                |
|                        |                 | oxaliplatin                 |
|                        | complicated     | filgrastim                  |
|                        |                 | platelets                   |
|                        |                 | red blood cells             |
| whole blood            |                 |                             |
| COPD                   | uncomplicated   | beclometasone               |
|                        |                 | budesonide_formoterol       |
|                        |                 | ipratropium bromide         |
|                        |                 | salbutamol                  |
|                        | complicated     | amoxicillin                 |
|                        |                 | amoxicillin_clavulanic acid |

|                            |               |                                   |
|----------------------------|---------------|-----------------------------------|
|                            |               | cefalexin                         |
|                            |               | doxycycline                       |
| Diabetes                   | uncomplicated | gliclazide                        |
|                            |               | insulin injection (soluble)       |
|                            |               | intermediate acting insulin       |
|                            |               | metformin                         |
|                            | complicated   | potassium chloride                |
| Diarrheal disease          | uncomplicated | ciprofloxacin                     |
|                            | complicated   | azithromycin                      |
|                            |               | ciprofloxacin [PAR]               |
| HIV                        | triage        | condoms                           |
|                            | uncomplicated | dolutegravir                      |
|                            |               | efavirenz (EFV or EFZ)            |
|                            |               | efavirenz_emtricitabine_tenofovir |
|                            |               | efavirenz_lamivudine_tenofovir    |
|                            |               | emtricitabine_tenofovir           |
|                            |               | zidovudine (ZDV or AZT)           |
|                            | complicated   | abacavir (ABC)                    |
|                            |               | abacavir (ABC)_lamivudine (3TC)   |
|                            |               | atazanavir                        |
|                            |               | darunavir                         |
|                            |               | lopinavir_ritonavir (LPV/r)       |
|                            |               | raltegravir                       |
|                            |               | zidovudine_lamivudine             |
| Hypertensive heart disease | uncomplicated | amiloride                         |
|                            |               | bisoprolol                        |
|                            |               | furosemide                        |
|                            |               | hydrochlorothiazide               |
|                            |               | losartan                          |
|                            |               | spironolactone                    |
|                            | complicated   | digoxin                           |
|                            |               | dopamine                          |
|                            |               | red blood cells                   |
|                            |               | whole blood                       |
| Liver cancer               | complicated   | filgrastim                        |
|                            |               | platelets                         |
|                            |               | red blood cells                   |
|                            |               | sorafenib                         |
|                            |               | whole blood                       |
| Lung cancer                | uncomplicated | carboplatin                       |
|                            |               | paclitaxel                        |
|                            | complicated   | cisplatin                         |
|                            |               | etoposide                         |
|                            |               | filgrastim                        |
|                            |               | gefitinib                         |
|                            |               | gemcitabine                       |
|                            |               | platelets                         |
|                            |               | red blood cells                   |
|                            |               | vinorelbine                       |

|                              |               |                                              |
|------------------------------|---------------|----------------------------------------------|
|                              |               | whole blood                                  |
| Malaria                      | uncomplicated | amodiaquine                                  |
|                              |               | artemether                                   |
|                              |               | artemether_lumefantrine                      |
|                              |               | artesunate                                   |
|                              |               | artesunate_amodiaquine                       |
|                              |               | artesunate_mefloquine                        |
|                              |               | doxycycline                                  |
|                              |               | primaquine                                   |
|                              |               | sulfadoxine_pyrimethamine                    |
|                              | complicated   | quinine                                      |
| Lower respiratory infections | uncomplicated | amoxicillin                                  |
|                              |               | amoxicillin_clavulanic acid                  |
|                              |               | ampicillin                                   |
|                              |               | benzylpenicillin                             |
|                              |               | clarithromycin                               |
|                              |               | doxycycline                                  |
|                              | complicated   | aztreonam                                    |
|                              |               | cefotaxime                                   |
|                              |               | ceftriaxone                                  |
|                              |               | cephalosporin5thGen                          |
|                              |               | gentamicin                                   |
|                              |               | oxazolindinones                              |
|                              |               | phenoxymethylpenicillin                      |
|                              |               | tigecycline                                  |
| Preeclampsia                 | complicated   | hydralazine                                  |
|                              |               | magnesium sulfate                            |
|                              |               | methyl dopa                                  |
| Cerebrovascular disease      | uncomplicated | clopidogrel                                  |
|                              | complicated   | streptokinase                                |
| Trauma                       | complicated   | dextran 70                                   |
|                              |               | fresh frozen plasma                          |
|                              |               | halothane                                    |
|                              |               | isoflurane                                   |
|                              |               | ketamine                                     |
|                              |               | oxygen                                       |
|                              |               | platelets                                    |
|                              |               | propofol                                     |
|                              |               | red blood cells                              |
|                              |               | tranexamic acid                              |
|                              |               | whole blood                                  |
| Tuberculosis                 | uncomplicated | ethambutol                                   |
|                              |               | ethambutol_isoniazid                         |
|                              |               | ethambutol_isoniazid_rifampicin              |
|                              |               | isoniazid                                    |
|                              |               | rifampicin_isoniazid                         |
|                              |               | rifampicin_isoniazid_pyrazinamide            |
|                              |               | rifampicin_isoniazid_pyrazinamide_ethambutol |
|                              | complicated   | amikacin                                     |

---

bedaquiline

---

capreomycin

---

cycloserine

---

delamanid

---

ethionamide

---

kanamycin

---

levofloxacin

---

linezolid

---

moxifloxacin

---

p aminosalicylic acid

---

pyrazinamide

---

rifabutin

---

rifampicin

---

rifapentine

---

Supplementary Table S3. Mapping diagnostics to diseases (condition- and medicine-related indications).

| Condition                      | Condition Level                                                                    | Diagnostic                     | Diagnostic Indication     |
|--------------------------------|------------------------------------------------------------------------------------|--------------------------------|---------------------------|
| Ischemic heart disease         | triage                                                                             | Cardiac marker                 | Diagnosis                 |
|                                | uncomplicated                                                                      | CBC                            | Monitoring<br>Toxicity    |
| Coagulation function (PT, PTT) |                                                                                    | Pathophysiology                |                           |
| Creatine kinase                |                                                                                    | Toxicity                       |                           |
| Creatinine clearance           |                                                                                    | Dosing/Safety                  |                           |
| CT scan                        |                                                                                    | Complication<br>DiffDiagnosis  |                           |
| D-dimer products               |                                                                                    | DiffDiagnosis                  |                           |
| Echocardiogram                 |                                                                                    | Diagnosis                      |                           |
| Electrolytes (Na, K, Cl)       |                                                                                    | Monitoring                     |                           |
| Glucose                        |                                                                                    | CoMorbidity                    |                           |
| HbA1c                          |                                                                                    | CoMorbidity                    |                           |
| Lipid panel                    |                                                                                    | Pathophysiology                |                           |
| Liver enzymes                  |                                                                                    | Toxicity                       |                           |
| Liver function                 |                                                                                    | Toxicity                       |                           |
| Magnesium                      |                                                                                    | Monitoring                     |                           |
| Renal function                 |                                                                                    | Complication                   |                           |
| X-ray                          |                                                                                    | Diagnosis<br>DiffDiagnosis     |                           |
| complicated                    |                                                                                    | anti-Xa assay (heparin)        | Dosing/Safety             |
|                                |                                                                                    | B-type natriuretic peptide     | Toxicity                  |
|                                |                                                                                    | Basic interventional radiology | Diagnosis                 |
|                                |                                                                                    | Blood gas                      | Toxicity                  |
|                                |                                                                                    | CBC                            | Toxicity                  |
|                                |                                                                                    | Coagulation function (PT, PTT) | Dosing/Safety<br>Toxicity |
|                                |                                                                                    | Creatinine clearance           | Dosing/Safety             |
|                                |                                                                                    | CT scan                        | Diagnosis                 |
|                                |                                                                                    | culture, Bacterial             | Toxicity                  |
|                                |                                                                                    | Direct antiglobulin test       | Toxicity                  |
|                                | Fecal occult blood                                                                 | Toxicity                       |                           |
|                                | Haptoglobin                                                                        | Toxicity                       |                           |
|                                | Immunoglobulins, quantitative (IgG, IgA, IgM)                                      | Toxicity                       |                           |
|                                | Indirect antiglobulin test                                                         | Toxicity                       |                           |
|                                | Lactate dehydrogenase                                                              | Toxicity                       |                           |
|                                | Liver function                                                                     | Toxicity                       |                           |
|                                | Microscopy for microorganisms (gram, AFB, iodine, trichrome, india ink, KOH, etc.) | Toxicity                       |                           |
|                                | Microscopy, CBC                                                                    | Toxicity                       |                           |
|                                | MRI                                                                                | Diagnosis                      |                           |
|                                | Nuclear radiology                                                                  | Diagnosis                      |                           |
|                                | PET scan                                                                           | Diagnosis                      |                           |

|                |               |                                                                                    |                 |
|----------------|---------------|------------------------------------------------------------------------------------|-----------------|
|                |               | Red blood cell typing                                                              | Dosing/Safety   |
|                |               |                                                                                    | Toxicity        |
|                |               | Urinalysis                                                                         | Toxicity        |
| Antenatal care | triage        | Bacterial AST                                                                      | Diagnosis       |
|                |               | Biochemical bacterial identification                                               | Diagnosis       |
|                |               | CBC                                                                                | Diagnosis       |
|                |               | culture, Bacterial                                                                 | Diagnosis       |
|                |               | Glucose                                                                            | Diagnosis       |
|                |               | Hemoglobin                                                                         | Diagnosis       |
|                |               | Microscopy for microorganisms (gram, AFB, iodine, trichrome, india ink, KOH, etc.) | Diagnosis       |
|                |               | Red blood cell typing                                                              | Diagnosis       |
|                |               | serology, HIV                                                                      | Diagnosis       |
|                |               | serology, Syphilis (RPR, treponemal)                                               | Diagnosis       |
|                |               | Ultrasound, POC                                                                    | Diagnosis       |
|                |               | Urinalysis                                                                         | Diagnosis       |
|                |               | Urinalysis, microscopic                                                            | Diagnosis       |
| Breast cancer  | triage        | Mammography                                                                        | Diagnosis       |
|                | uncomplicated | Advanced breast imaging                                                            | Diagnosis       |
|                |               | Alkaline phosphatase                                                               | Toxicity        |
|                |               | Calcium                                                                            | Toxicity        |
|                |               | CBC                                                                                | Toxicity        |
|                |               | Creatinine clearance                                                               | Dosing/Safety   |
|                |               | CT scan                                                                            | Diagnosis       |
|                |               | Electrolytes (Na, K, Cl)                                                           | Toxicity        |
|                |               | Glucose                                                                            | Toxicity        |
|                |               | HbA1c                                                                              | Toxicity        |
|                |               | Histopathology/Cytopathology                                                       | Diagnosis       |
|                |               |                                                                                    | DiffDiagnosis   |
|                |               | Human chorionic gonadotropin                                                       | Dosing/Safety   |
|                |               | Immunohistopathology/Immunocytopathology                                           | Diagnosis       |
|                |               |                                                                                    | DiffDiagnosis   |
|                |               |                                                                                    | Pathophysiology |
|                |               | Lipid panel                                                                        | Toxicity        |
|                |               | Liver enzymes                                                                      | Toxicity        |
|                |               | Liver function                                                                     | Dosing/Safety   |
|                |               |                                                                                    | Toxicity        |
|                |               | molecular, Breast cancer (ER, PR, HER2)                                            | Pathophysiology |
|                |               | molecular, Estrogen receptor                                                       | Companion       |
|                |               | molecular, HER2                                                                    | Companion       |
|                |               | MRI                                                                                | Diagnosis       |
|                |               | Nuclear radiology                                                                  | Diagnosis       |
|                |               | PET scan                                                                           | Diagnosis       |
|                |               | Phosphorus                                                                         | Toxicity        |
|                |               | Renal function                                                                     | Toxicity        |
|                |               | therapeutic drug monitoring, Methotrexate                                          | Dosing/Safety   |



|                                                                                    |                    |                                                                                    |                                |               |
|------------------------------------------------------------------------------------|--------------------|------------------------------------------------------------------------------------|--------------------------------|---------------|
|                                                                                    |                    | Uric acid                                                                          | Toxicity                       |               |
|                                                                                    |                    | Urinalysis, microscopic                                                            | Toxicity                       |               |
| complicated                                                                        |                    | B-type natriuretic peptide                                                         | Toxicity                       |               |
|                                                                                    |                    | Blood gas                                                                          | Toxicity                       |               |
|                                                                                    |                    | CBC                                                                                | Toxicity                       |               |
|                                                                                    |                    | Coagulation function (PT, PTT)                                                     | Toxicity                       |               |
|                                                                                    |                    | culture, Bacterial                                                                 | Toxicity                       |               |
|                                                                                    |                    | Direct antiglobulin test                                                           | Toxicity                       |               |
|                                                                                    |                    | Haptoglobin                                                                        | Toxicity                       |               |
|                                                                                    |                    | Immunoglobulins, quantitative (IgG, IgA, IgM)                                      | Toxicity                       |               |
|                                                                                    |                    | Indirect antiglobulin test                                                         | Toxicity                       |               |
|                                                                                    |                    | Lactate dehydrogenase                                                              | Toxicity                       |               |
|                                                                                    |                    | Liver function                                                                     | Toxicity                       |               |
|                                                                                    |                    | Microscopy for microorganisms (gram, AFB, iodine, trichrome, india ink, KOH, etc.) | Toxicity                       |               |
|                                                                                    |                    | Microscopy, CBC                                                                    | Toxicity                       |               |
|                                                                                    |                    | Red blood cell typing                                                              | Dosing/Safety                  |               |
|                                                                                    |                    |                                                                                    | Toxicity                       |               |
|                                                                                    |                    | Urinalysis                                                                         | Toxicity                       |               |
|                                                                                    | COPD               | uncomplicated                                                                      | alpha-1 antitrypsin deficiency | DiffDiagnosis |
|                                                                                    |                    |                                                                                    | B-type natriuretic peptide     | DiffDiagnosis |
|                                                                                    |                    |                                                                                    | Blood gas                      | Diagnosis     |
|                                                                                    |                    |                                                                                    | Monitoring                     |               |
| CBC                                                                                |                    |                                                                                    | DiffDiagnosis                  |               |
| Electrolytes (Na, K, Cl)                                                           |                    |                                                                                    | DiffDiagnosis                  |               |
|                                                                                    |                    |                                                                                    | Toxicity                       |               |
| Glucose                                                                            |                    |                                                                                    | DiffDiagnosis                  |               |
| Renal function                                                                     |                    |                                                                                    | Toxicity                       |               |
| TSH                                                                                |                    | DiffDiagnosis                                                                      |                                |               |
| X-ray                                                                              |                    | Diagnosis                                                                          |                                |               |
| complicated                                                                        |                    | Bacterial AST                                                                      | Complication                   |               |
|                                                                                    |                    | Biochemical bacterial identification                                               | Complication                   |               |
|                                                                                    |                    | Cardiac marker                                                                     | DiffDiagnosis                  |               |
|                                                                                    |                    | CBC                                                                                | Toxicity                       |               |
|                                                                                    |                    |                                                                                    |                                |               |
|                                                                                    |                    | Creatinine clearance                                                               | Dosing/Safety                  |               |
|                                                                                    |                    | CT scan                                                                            | Complication                   |               |
|                                                                                    |                    |                                                                                    | DiffDiagnosis                  |               |
|                                                                                    | culture, Bacterial | Complication                                                                       |                                |               |
|                                                                                    | Liver enzymes      | Toxicity                                                                           |                                |               |
| Liver function                                                                     | Toxicity           |                                                                                    |                                |               |
| Microscopy for microorganisms (gram, AFB, iodine, trichrome, india ink, KOH, etc.) | Complication       |                                                                                    |                                |               |
| nucleic acid testing, Tuberculosis                                                 | CoMorbidity        |                                                                                    |                                |               |
| Renal function                                                                     | Toxicity           |                                                                                    |                                |               |
| Chronic kidney disease                                                             | triage             | Renal function                                                                     | Diagnosis                      |               |
|                                                                                    |                    |                                                                                    | Monitoring                     |               |

|                          |                                                                                    |               |
|--------------------------|------------------------------------------------------------------------------------|---------------|
| uncomplicated            | Urinalysis                                                                         | Diagnosis     |
|                          |                                                                                    | Monitoring    |
|                          | Bicarbonate                                                                        | Toxicity      |
|                          | Calcium                                                                            | Monitoring    |
|                          |                                                                                    | Toxicity      |
|                          | CBC                                                                                | Toxicity      |
|                          |                                                                                    |               |
|                          | Creatinine clearance                                                               | Dosing/Safety |
|                          | Electrolytes (Na, K, Cl)                                                           | Monitoring    |
|                          |                                                                                    | Toxicity      |
|                          |                                                                                    |               |
|                          | Glucose                                                                            | Toxicity      |
|                          | Hemoglobin                                                                         | Complication  |
|                          | Human chorionic gonadotropin                                                       | Dosing/Safety |
|                          |                                                                                    |               |
|                          | Lipid panel                                                                        | CoMorbidity   |
|                          | Liver enzymes                                                                      | Toxicity      |
|                          | Liver function                                                                     | Dosing/Safety |
|                          |                                                                                    | Toxicity      |
|                          | Magnesium                                                                          | Toxicity      |
| Phosphorus               | Monitoring                                                                         |               |
| Renal function           | Toxicity                                                                           |               |
|                          |                                                                                    |               |
| Ultrasound               | Diagnosis                                                                          |               |
| Uric acid                | Toxicity                                                                           |               |
|                          |                                                                                    |               |
| Urinalysis, microscopic  | Diagnosis                                                                          |               |
| Urine albumin/creatinine | Diagnosis                                                                          |               |
|                          | Monitoring                                                                         |               |
| Urine protein/creatinine | Diagnosis                                                                          |               |
|                          | Monitoring                                                                         |               |
| complicated              | B-type natriuretic peptide                                                         | Toxicity      |
|                          | Blood gas                                                                          | Complication  |
|                          |                                                                                    | Toxicity      |
|                          | CBC                                                                                | Toxicity      |
|                          | Coagulation function (PT, PTT)                                                     | Toxicity      |
|                          | culture, Bacterial                                                                 | Toxicity      |
|                          | Direct antiglobulin test                                                           | Toxicity      |
|                          | Haptoglobin                                                                        | Toxicity      |
|                          | Immunoglobulins, quantitative (IgG, IgA, IgM)                                      | Toxicity      |
|                          | Immunohistopathology/Immunocytopathology                                           | Diagnosis     |
|                          | Indirect antiglobulin test                                                         | Toxicity      |
|                          | Lactate dehydrogenase                                                              | Toxicity      |
|                          | Liver function                                                                     | Toxicity      |
|                          | Microscopy for microorganisms (gram, AFB, iodine, trichrome, india ink, KOH, etc.) | Toxicity      |
|                          | Microscopy, CBC                                                                    | Toxicity      |
|                          | Parathyroid hormone                                                                | Complication  |
|                          | Red blood cell typing                                                              | Dosing/Safety |
|                          |                                                                                    | Toxicity      |

|                                                                                    |                                |                                          |                            |               |
|------------------------------------------------------------------------------------|--------------------------------|------------------------------------------|----------------------------|---------------|
| Colorectal cancer                                                                  | triage                         | Urinalysis                               | Toxicity                   |               |
|                                                                                    |                                | Vitamin D, hydroxy (25)                  | Complication               |               |
|                                                                                    |                                | Fecal Immunochemical Test                | Diagnosis                  |               |
|                                                                                    |                                | Fecal occult blood                       | Diagnosis                  |               |
|                                                                                    |                                | Hemoglobin                               | Diagnosis                  |               |
|                                                                                    | uncomplicated                  | Carcinoembryonic antigen (CEA)           | Monitoring                 |               |
|                                                                                    |                                | CBC                                      | Toxicity                   |               |
|                                                                                    |                                | Coagulation function (PT, PTT)           | Toxicity                   |               |
|                                                                                    |                                | Creatinine clearance                     | Dosing/Safety              |               |
|                                                                                    |                                | CT scan                                  | Diagnosis                  |               |
|                                                                                    |                                | Electrolytes (Na, K, Cl)                 | Toxicity                   |               |
|                                                                                    |                                | Glucose                                  | Toxicity                   |               |
|                                                                                    |                                | Histopathology/Cytopathology             | Diagnosis                  |               |
|                                                                                    |                                |                                          | DiffDiagnosis              |               |
|                                                                                    |                                | Human chorionic gonadotropin             | Dosing/Safety              |               |
|                                                                                    |                                | Immunohistopathology/Immunocytopathology | Diagnosis                  |               |
|                                                                                    |                                |                                          | DiffDiagnosis              |               |
|                                                                                    |                                |                                          | Pathophysiology            |               |
|                                                                                    |                                | Iron deficiency panel                    | CoMorbidity                |               |
|                                                                                    |                                | Liver enzymes                            | Toxicity                   |               |
|                                                                                    |                                | Liver function                           | Dosing/Safety              |               |
|                                                                                    |                                |                                          | Toxicity                   |               |
|                                                                                    |                                | Magnesium                                | Toxicity                   |               |
|                                                                                    |                                | Microsatellite instability testing       | Pathophysiology            |               |
|                                                                                    |                                | MRI                                      | Diagnosis                  |               |
|                                                                                    |                                | Renal function                           | Toxicity                   |               |
|                                                                                    |                                | Ultrasound                               | Diagnosis                  |               |
|                                                                                    |                                | complicated                              | B-type natriuretic peptide | Toxicity      |
|                                                                                    |                                |                                          | Blood gas                  | Toxicity      |
|                                                                                    |                                |                                          | CBC                        | Toxicity      |
|                                                                                    |                                |                                          |                            |               |
|                                                                                    | Coagulation function (PT, PTT) |                                          | Toxicity                   |               |
|                                                                                    | culture, Bacterial             |                                          | Toxicity                   |               |
| Direct antiglobulin test                                                           | Toxicity                       |                                          |                            |               |
| Haptoglobin                                                                        | Toxicity                       |                                          |                            |               |
| Immunoglobulins, quantitative (IgG, IgA, IgM)                                      | Toxicity                       |                                          |                            |               |
| Indirect antiglobulin test                                                         | Toxicity                       |                                          |                            |               |
| Lactate dehydrogenase                                                              | Toxicity                       |                                          |                            |               |
| Liver function                                                                     | Toxicity                       |                                          |                            |               |
| Microscopy for microorganisms (gram, AFB, iodine, trichrome, india ink, KOH, etc.) | Toxicity                       |                                          |                            |               |
| Microscopy, CBC                                                                    | Toxicity                       |                                          |                            |               |
| PET scan                                                                           | Diagnosis                      |                                          |                            |               |
| Red blood cell typing                                                              | Dosing/Safety                  |                                          |                            |               |
|                                                                                    | Toxicity                       |                                          |                            |               |
| Urinalysis                                                                         | Toxicity                       |                                          |                            |               |
| Dementia                                                                           | uncomplicated                  |                                          | CBC                        | DiffDiagnosis |
|                                                                                    |                                |                                          | Hemoglobin                 | DiffDiagnosis |
|                                                                                    |                                | serology, Syphilis (RPR, treponemal)     | DiffDiagnosis              |               |
|                                                                                    |                                | TSH                                      | DiffDiagnosis              |               |
|                                                                                    |                                |                                          |                            |               |

|                   |               |                                                                                    |               |
|-------------------|---------------|------------------------------------------------------------------------------------|---------------|
|                   |               | Vitamin B12                                                                        | DiffDiagnosis |
|                   | complicated   | CT scan                                                                            | Diagnosis     |
|                   |               | MRI                                                                                | Diagnosis     |
| Diabetes          | triage        | Glucose                                                                            | Diagnosis     |
|                   |               |                                                                                    | Monitoring    |
|                   |               | Urinalysis                                                                         | Diagnosis     |
|                   | uncomplicated | CBC                                                                                | Toxicity      |
|                   |               | Creatinine clearance                                                               | Dosing/Safety |
|                   |               | Electrolytes (Na, K, Cl)                                                           | Complication  |
|                   |               |                                                                                    | Toxicity      |
|                   |               | Glucose                                                                            | Toxicity      |
|                   |               | HbA1c                                                                              | Diagnosis     |
|                   |               |                                                                                    | Monitoring    |
|                   |               | Lipid panel                                                                        | CoMorbidity   |
|                   |               | Phosphorus                                                                         | Complication  |
|                   |               | Renal function                                                                     | Complication  |
|                   |               |                                                                                    | Monitoring    |
|                   |               | Urine albumin/creatinine                                                           | Monitoring    |
|                   |               | Vitamin B12                                                                        | Toxicity      |
|                   | complicated   | Blood gas                                                                          | Complication  |
|                   |               |                                                                                    | Toxicity      |
|                   |               | Electrolytes (Na, K, Cl)                                                           | Dosing/Safety |
|                   |               | Ketones                                                                            | Complication  |
|                   |               | Renal function                                                                     | Toxicity      |
| Diarrheal disease | triage        | Fecal leukocytes                                                                   | Diagnosis     |
|                   |               |                                                                                    | Monitoring    |
|                   |               | Microscopy, ova and parasites                                                      | Diagnosis     |
|                   |               |                                                                                    | Monitoring    |
|                   | uncomplicated | CBC                                                                                | Toxicity      |
|                   |               | Creatinine clearance                                                               | Dosing/Safety |
|                   |               | G6PD enzyme testing                                                                | Dosing/Safety |
|                   |               | Liver enzymes                                                                      | Toxicity      |
|                   |               | Renal function                                                                     | Toxicity      |
|                   | complicated   | antigen, Entamoeba                                                                 | DiffDiagnosis |
|                   |               | antigen, Shiga                                                                     | Diagnosis     |
|                   |               | Bacterial AST                                                                      | DST           |
|                   |               | Biochemical bacterial identification                                               | Diagnosis     |
|                   |               | CBC                                                                                | Complication  |
|                   |               |                                                                                    | Toxicity      |
|                   |               | Creatinine clearance                                                               | Dosing/Safety |
|                   |               | culture, Bacterial                                                                 | Diagnosis     |
|                   |               | G6PD enzyme testing                                                                | Toxicity      |
|                   |               | Hemoglobin                                                                         | Complication  |
|                   |               | Liver enzymes                                                                      | Toxicity      |
|                   |               |                                                                                    |               |
|                   |               | Microscopy for microorganisms (gram, AFB, iodine, trichrome, india ink, KOH, etc.) | Diagnosis     |
|                   |               | nucleic acid testing, Shiga                                                        | Diagnosis     |
|                   |               | Renal function                                                                     | Toxicity      |
|                   |               | serology, Entamoeba                                                                | DiffDiagnosis |

|                            |               |                                                      |                 |
|----------------------------|---------------|------------------------------------------------------|-----------------|
|                            |               | serology, Typhoid fever                              | Diagnosis       |
| HIV                        | triage        | serology, HIV                                        | Diagnosis       |
|                            | uncomplicated | Amylase                                              | Toxicity        |
|                            |               | Antinuclear antibodies                               | DiffDiagnosis   |
|                            |               | CBC                                                  | Complication    |
|                            |               |                                                      | Toxicity        |
|                            |               | Creatinine clearance                                 | Dosing/Safety   |
|                            |               | Electrolytes (Na, K, Cl)                             | Toxicity        |
|                            |               | Glucose                                              | Toxicity        |
|                            |               | HbA1c                                                | Toxicity        |
|                            |               | HIV RNA quantitative                                 | Monitoring      |
|                            |               | Human chorionic gonadotropin                         | Dosing/Safety   |
|                            |               |                                                      | Monitoring      |
|                            |               | Lipase                                               | Toxicity        |
|                            |               | Lipid panel                                          | Toxicity        |
|                            |               | Liver enzymes                                        | Toxicity        |
|                            |               | Liver function                                       | Toxicity        |
|                            |               | Lymphocyte CD4                                       | Monitoring      |
|                            |               | nucleic acid testing, Chlamydia                      | CoMorbidity     |
|                            |               | nucleic acid testing, N. gonorrhoeae                 | CoMorbidity     |
|                            |               | Phosphorus                                           | Toxicity        |
|                            |               | Qualitative HIV virological (RNA, DNA, or US p24 Ag) | Diagnosis       |
|                            |               |                                                      |                 |
|                            |               | Renal function                                       | Complication    |
|                            |               |                                                      | Toxicity        |
|                            |               | serology, HBV                                        | CoMorbidity     |
|                            |               | serology, HCV                                        | CoMorbidity     |
|                            |               | serology, Syphilis (RPR, treponemal)                 | CoMorbidity     |
|                            |               | Urinalysis                                           | Complication    |
|                            | complicated   | Amylase                                              | Toxicity        |
|                            |               |                                                      |                 |
|                            |               | CBC                                                  | Toxicity        |
|                            |               | Creatinine clearance                                 | Dosing/Safety   |
|                            |               | Electrolytes (Na, K, Cl)                             | Toxicity        |
|                            |               | Glucose                                              | Toxicity        |
|                            |               | HbA1c                                                | Toxicity        |
|                            |               | Human chorionic gonadotropin                         | Dosing/Safety   |
|                            |               | Lipase                                               | Toxicity        |
|                            |               |                                                      |                 |
|                            |               | Lipid panel                                          | Toxicity        |
|                            |               | Liver enzymes                                        | Toxicity        |
|                            |               | Liver function                                       | Dosing/Safety   |
|                            |               |                                                      | Toxicity        |
|                            |               | Renal function                                       | Toxicity        |
| Hypertensive heart disease | triage        | Glucose                                              | CoMorbidity     |
|                            |               | HbA1c                                                | CoMorbidity     |
|                            |               | Lipid panel                                          | Pathophysiology |

|               |                                                                                    |               |
|---------------|------------------------------------------------------------------------------------|---------------|
| uncomplicated | B-type natriuretic peptide                                                         | Diagnosis     |
|               |                                                                                    | Monitoring    |
|               | Bicarbonate                                                                        | Toxicity      |
|               | Calcium                                                                            | Toxicity      |
|               | CBC                                                                                | Toxicity      |
|               | Creatinine clearance                                                               | Dosing/Safety |
|               | CT scan                                                                            | Monitoring    |
|               | Echocardiogram                                                                     | Diagnosis     |
|               | Electrolytes (Na, K, Cl)                                                           | Complication  |
|               |                                                                                    | Toxicity      |
|               | Glucose                                                                            | Toxicity      |
|               | Hemoglobin                                                                         | Monitoring    |
|               | Human chorionic gonadotropin                                                       | Dosing/Safety |
|               | Liver enzymes                                                                      | Complication  |
|               |                                                                                    | Toxicity      |
|               | Liver function                                                                     | Complication  |
|               |                                                                                    | Toxicity      |
|               | Magnesium                                                                          | Toxicity      |
|               | Renal function                                                                     | Complication  |
|               |                                                                                    | Toxicity      |
| Uric acid     | Toxicity                                                                           |               |
| X-ray         | Diagnosis                                                                          |               |
| complicated   | B-type natriuretic peptide                                                         | Toxicity      |
|               | Basic interventional radiology                                                     | Diagnosis     |
|               | Blood gas                                                                          | Toxicity      |
|               | Calcium                                                                            | Toxicity      |
|               | CBC                                                                                | Toxicity      |
|               | Coagulation function (PT, PTT)                                                     | Toxicity      |
|               | Creatinine clearance                                                               | Dosing/Safety |
|               | CT scan                                                                            | Diagnosis     |
|               | culture, Bacterial                                                                 | Toxicity      |
|               | Direct antiglobulin test                                                           | Toxicity      |
|               | Electrolytes (Na, K, Cl)                                                           | Toxicity      |
|               | Haptoglobin                                                                        | Toxicity      |
|               | Immunoglobulins, quantitative (IgG, IgA, IgM)                                      | Toxicity      |
|               | Indirect antiglobulin test                                                         | Toxicity      |
|               | Lactate dehydrogenase                                                              | Toxicity      |
|               | Liver function                                                                     | Toxicity      |
|               | Magnesium                                                                          | Toxicity      |
|               | Microscopy for microorganisms (gram, AFB, iodine, trichrome, india ink, KOH, etc.) | Toxicity      |
|               | Microscopy, CBC                                                                    | Toxicity      |
|               | MRI                                                                                | Diagnosis     |
|               | PET scan                                                                           | Diagnosis     |
|               | Red blood cell typing                                                              | Dosing/Safety |
|               |                                                                                    | Toxicity      |

|                                                                                    |                |                                          |                            |          |
|------------------------------------------------------------------------------------|----------------|------------------------------------------|----------------------------|----------|
|                                                                                    |                | Renal function                           | Toxicity                   |          |
|                                                                                    |                | Urinalysis                               | Toxicity                   |          |
| Liver cancer                                                                       | uncomplicated  | Alkaline phosphatase                     | Diagnosis                  |          |
|                                                                                    |                | Alpha-fetoprotein                        | Diagnosis                  |          |
|                                                                                    |                |                                          | Monitoring                 |          |
|                                                                                    |                | CA 19-9                                  | DiffDiagnosis              |          |
|                                                                                    |                | Carcinoembryonic antigen (CEA)           | Diagnosis                  |          |
|                                                                                    |                |                                          | DiffDiagnosis              |          |
|                                                                                    |                | CBC                                      | Diagnosis                  |          |
|                                                                                    |                | Coagulation function (PT, PTT)           | Diagnosis                  |          |
|                                                                                    |                | CT scan                                  | Diagnosis                  |          |
|                                                                                    |                | Histopathology/Cytopathology             | Diagnosis                  |          |
|                                                                                    |                |                                          | DiffDiagnosis              |          |
|                                                                                    |                | Immunohistopathology/Immunocytopathology | DiffDiagnosis              |          |
|                                                                                    |                | Liver enzymes                            | Diagnosis                  |          |
|                                                                                    | Liver function | Diagnosis                                |                            |          |
|                                                                                    | MRI            | Diagnosis                                |                            |          |
|                                                                                    | Renal function | Diagnosis                                |                            |          |
|                                                                                    | serology, HBV  | Pathophysiology                          |                            |          |
|                                                                                    | serology, HCV  | Pathophysiology                          |                            |          |
|                                                                                    | Ultrasound     | Diagnosis                                |                            |          |
|                                                                                    | complicated    |                                          | B-type natriuretic peptide | Toxicity |
|                                                                                    |                |                                          | Blood gas                  | Toxicity |
|                                                                                    |                |                                          | Calcium                    | Toxicity |
|                                                                                    |                |                                          | CBC                        | Toxicity |
|                                                                                    |                |                                          |                            |          |
| Coagulation function (PT, PTT)                                                     |                |                                          | Dosing/Safety              |          |
|                                                                                    |                |                                          | Toxicity                   |          |
| Creatinine clearance                                                               |                |                                          | Dosing/Safety              |          |
| culture, Bacterial                                                                 |                |                                          | Toxicity                   |          |
| Direct antiglobulin test                                                           |                |                                          | Toxicity                   |          |
| Electrolytes (Na, K, Cl)                                                           |                |                                          | Toxicity                   |          |
| Haptoglobin                                                                        |                |                                          | Toxicity                   |          |
| Immunoglobulins, quantitative (IgG, IgA, IgM)                                      |                |                                          | Toxicity                   |          |
| Indirect antiglobulin test                                                         |                | Toxicity                                 |                            |          |
| Lactate dehydrogenase                                                              |                | Toxicity                                 |                            |          |
| Liver function                                                                     |                | Dosing/Safety                            |                            |          |
|                                                                                    |                | Toxicity                                 |                            |          |
| Magnesium                                                                          |                | Toxicity                                 |                            |          |
| Microscopy for microorganisms (gram, AFB, iodine, trichrome, india ink, KOH, etc.) |                | Toxicity                                 |                            |          |
| Microscopy, CBC                                                                    |                | Toxicity                                 |                            |          |
| Red blood cell typing                                                              |                | Dosing/Safety                            |                            |          |
|                                                                                    |                | Toxicity                                 |                            |          |
| Urinalysis                                                                         |                | Toxicity                                 |                            |          |
| Lung cancer                                                                        | triage         | X-ray                                    | Diagnosis                  |          |
|                                                                                    | uncomplicated  | CBC                                      | Toxicity                   |          |
|                                                                                    |                | Creatinine clearance                     | Dosing/Safety              |          |
|                                                                                    |                | Histopathology/Cytopathology             | Diagnosis                  |          |
|                                                                                    |                |                                          | DiffDiagnosis              |          |

|             |               |                                                                                    |                 |
|-------------|---------------|------------------------------------------------------------------------------------|-----------------|
|             |               | Immunohistopathology/Immunocytopathology                                           | Diagnosis       |
|             |               |                                                                                    | DiffDiagnosis   |
|             |               |                                                                                    | Pathophysiology |
|             |               | Liver function                                                                     | Dosing/Safety   |
|             |               | MRI                                                                                | Diagnosis       |
|             |               | Nuclear radiology                                                                  | Diagnosis       |
| complicated |               | B-type natriuretic peptide                                                         | Toxicity        |
|             |               | Blood gas                                                                          | Toxicity        |
|             |               | Calcium                                                                            | Toxicity        |
|             |               | CBC                                                                                | Toxicity        |
|             |               |                                                                                    |                 |
|             |               | Coagulation function (PT, PTT)                                                     | Toxicity        |
|             |               | Creatinine clearance                                                               | Dosing/Safety   |
|             |               | CT scan                                                                            | Diagnosis       |
|             |               | culture, Bacterial                                                                 | Toxicity        |
|             |               | Direct antiglobulin test                                                           | Toxicity        |
|             |               | Electrolytes (Na, K, Cl)                                                           | Toxicity        |
|             |               | Haptoglobin                                                                        | Toxicity        |
|             |               | Immunoglobulins, quantitative (IgG, IgA, IgM)                                      | Toxicity        |
|             |               | Indirect antiglobulin test                                                         | Toxicity        |
|             |               | Lactate dehydrogenase                                                              | Toxicity        |
|             |               | Liver enzymes                                                                      | Toxicity        |
|             |               | Liver function                                                                     | Dosing/Safety   |
|             |               |                                                                                    | Toxicity        |
|             |               |                                                                                    |                 |
|             |               | Magnesium                                                                          | Toxicity        |
|             |               | Microscopy for microorganisms (gram, AFB, iodine, trichrome, india ink, KOH, etc.) | Toxicity        |
|             |               | Microscopy, CBC                                                                    | Toxicity        |
|             |               | molecular, Epidermal Growth Factor Receptor                                        | Companion       |
|             |               | PET scan                                                                           | Diagnosis       |
|             |               | Red blood cell typing                                                              | Dosing/Safety   |
|             |               |                                                                                    | Toxicity        |
|             |               | Renal function                                                                     | Toxicity        |
|             |               | Urinalysis                                                                         | Toxicity        |
| Malaria     | triage        | antigen, Malaria                                                                   | Diagnosis       |
|             |               | Microscopy, Malaria                                                                | Diagnosis       |
|             | uncomplicated | CBC                                                                                | Complication    |
|             |               |                                                                                    | Toxicity        |
|             |               |                                                                                    |                 |
|             |               | Coximetry                                                                          | Toxicity        |
|             |               | Electrolytes (Na, K, Cl)                                                           | Toxicity        |
|             |               | G6PD enzyme testing                                                                | Dosing/Safety   |
|             |               | Glucose                                                                            | Complication    |
|             |               | Haptoglobin                                                                        | Toxicity        |
|             |               | Human chorionic gonadotropin                                                       | Dosing/Safety   |
|             |               |                                                                                    |                 |
|             |               | Lactate dehydrogenase                                                              | Toxicity        |
|             |               | Liver enzymes                                                                      | Toxicity        |



|                              |               |                                                          |                                           |
|------------------------------|---------------|----------------------------------------------------------|-------------------------------------------|
|                              |               | Liver function                                           | Complication<br>Toxicity                  |
|                              |               | Microscopy, Malaria                                      | Monitoring                                |
|                              |               | Renal function                                           | Complication<br>Toxicity                  |
|                              |               | serology, Typhoid fever                                  | DiffDiagnosis                             |
|                              |               | Urinalysis                                               | Complication<br>Dosing/Safety<br>Toxicity |
|                              |               | X-ray                                                    | DiffDiagnosis                             |
|                              | complicated   | Blood gas                                                | Complication                              |
|                              |               | CBC                                                      | Toxicity                                  |
|                              |               | Coagulation function (PT, PTT)                           | Toxicity                                  |
|                              |               | Creatinine clearance                                     | Dosing/Safety                             |
|                              |               | CSF analysis (microscopy, cell counts, glucose, protein) | DiffDiagnosis                             |
|                              |               | culture, Bacterial                                       | CoMorbidity<br>DiffDiagnosis              |
|                              |               | Glucose                                                  | Toxicity                                  |
|                              |               | Liver function                                           | Toxicity                                  |
|                              |               | MRI                                                      | Complication                              |
| Lower respiratory infections | uncomplicated | CBC                                                      | Toxicity                                  |
|                              |               | Creatinine clearance                                     | Dosing/Safety                             |
|                              |               | Electrolytes (Na, K, Cl)                                 | Toxicity                                  |
|                              |               | ESR/CRP                                                  | Diagnosis                                 |
|                              |               | Liver enzymes                                            | Toxicity                                  |
|                              |               | Liver function                                           | Toxicity                                  |
|                              |               | Renal function                                           | Toxicity                                  |
|                              |               | X-ray                                                    | Diagnosis                                 |
|                              | complicated   | antigen, Legionella (urine)                              | Diagnosis                                 |
|                              |               | antigen, Pneumococcus (urine)                            | Diagnosis                                 |
|                              |               | B-type natriuretic peptide                               | DiffDiagnosis                             |
|                              |               | Bacterial AST                                            | DST                                       |
|                              |               | Biochemical bacterial identification                     | Diagnosis                                 |
|                              |               | CBC                                                      | Toxicity                                  |
|                              |               | Coagulation function (PT, PTT)                           | Toxicity                                  |
|                              |               | Creatinine clearance                                     | Dosing/Safety                             |
|                              |               | CT scan                                                  | Diagnosis                                 |

|                         |               |                                                                                    |                             |
|-------------------------|---------------|------------------------------------------------------------------------------------|-----------------------------|
|                         |               | culture, Bacterial                                                                 | Diagnosis                   |
|                         |               | D-dimer products                                                                   | DiffDiagnosis               |
|                         |               | Direct antiglobulin test                                                           | Toxicity                    |
|                         |               | Liver enzymes                                                                      | Toxicity                    |
|                         |               | Liver function                                                                     | Dosing/Safety<br>Toxicity   |
|                         |               | Microscopy for microorganisms (gram, AFB, iodine, trichrome, india ink, KOH, etc.) | Diagnosis                   |
|                         |               | nucleic acid testing, Respiratory virus panel                                      | Diagnosis                   |
|                         |               | Renal function                                                                     | Toxicity                    |
|                         |               | therapeutic drug monitoring, Gentamicin                                            | Dosing/Safety               |
|                         |               | Urinalysis, microscopic                                                            | Toxicity                    |
| Preeclampsia            | triage        | Urinalysis                                                                         | Diagnosis<br>Monitoring     |
|                         | uncomplicated | Antinuclear antibodies                                                             | DiffDiagnosis               |
|                         |               | CBC                                                                                | Diagnosis<br>Monitoring     |
|                         |               | Haptoglobin                                                                        | Diagnosis<br>Monitoring     |
|                         |               | Hemoglobin                                                                         | Diagnosis<br>Monitoring     |
|                         |               | Lactate dehydrogenase                                                              | Diagnosis<br>Monitoring     |
|                         |               | Liver enzymes                                                                      | Diagnosis<br>Monitoring     |
|                         |               | Microscopy, CBC                                                                    | Diagnosis<br>Monitoring     |
|                         |               | Renal function                                                                     | Monitoring                  |
|                         |               | Urine protein/creatinine                                                           | Diagnosis                   |
|                         | complicated   | Antinuclear antibodies                                                             | Toxicity                    |
|                         |               | CBC                                                                                | Toxicity                    |
|                         |               | Coagulation function (PT, PTT)                                                     | DiffDiagnosis               |
|                         |               | Creatinine clearance                                                               | Dosing/Safety               |
|                         |               | D-dimer products                                                                   | DiffDiagnosis               |
|                         |               | Direct antiglobulin test                                                           | Toxicity                    |
|                         |               | Fibrinogen                                                                         | DiffDiagnosis               |
|                         |               | Indirect antiglobulin test                                                         | Toxicity                    |
|                         |               | Liver enzymes                                                                      | Toxicity                    |
|                         |               | Liver function                                                                     | Toxicity                    |
|                         |               | Magnesium                                                                          | Dosing/Safety               |
| Cerebrovascular disease | uncomplicated | Antiphospholipid antibodies                                                        | Pathophysiology             |
|                         |               | Basic interventional radiology                                                     | Diagnosis                   |
|                         |               | CBC                                                                                | Pathophysiology<br>Toxicity |
|                         |               | Coagulation function (PT, PTT)                                                     | Pathophysiology             |
|                         |               | Complex interventional radiology                                                   | Diagnosis                   |

|        |               |                                                                                    |                 |
|--------|---------------|------------------------------------------------------------------------------------|-----------------|
|        |               | CT scan                                                                            | Diagnosis       |
|        |               | culture, Bacterial                                                                 | DiffDiagnosis   |
|        |               | D-dimer products                                                                   | DiffDiagnosis   |
|        |               | Electrolytes (Na, K, Cl)                                                           | Monitoring      |
|        |               | Glucose                                                                            | DiffDiagnosis   |
|        |               | Lipid panel                                                                        | Pathophysiology |
|        |               | MRI                                                                                | Diagnosis       |
|        |               | Renal function                                                                     | Monitoring      |
|        |               | Ultrasound                                                                         | Diagnosis       |
|        | complicated   | CBC                                                                                | Toxicity        |
|        |               | Coagulation function (PT, PTT)                                                     | Toxicity        |
| Trauma | uncomplicated | Creatine kinase                                                                    | Complication    |
|        |               | CT scan                                                                            | Diagnosis       |
|        |               | Glucose                                                                            | Complication    |
|        |               | Human chorionic gonadotropin                                                       | CoMorbidity     |
|        |               | Ultrasound                                                                         | Diagnosis       |
|        |               | X-ray                                                                              | Diagnosis       |
|        | complicated   | B-type natriuretic peptide                                                         | Toxicity        |
|        |               | Blood gas                                                                          | Complication    |
|        |               |                                                                                    | Dosing/Safety   |
|        |               |                                                                                    | Monitoring      |
|        |               |                                                                                    | Toxicity        |
|        |               | CBC                                                                                | Toxicity        |
|        |               | Coagulation function (PT, PTT)                                                     | Complication    |
|        |               |                                                                                    | Toxicity        |
|        |               | Creatine kinase                                                                    | Toxicity        |
|        |               | Creatinine clearance                                                               | Dosing/Safety   |
|        |               | culture, Bacterial                                                                 | Toxicity        |
|        |               | Direct antiglobulin test                                                           | Toxicity        |
|        |               | Electrolytes (Na, K, Cl)                                                           | Toxicity        |
|        |               | Fibrinogen                                                                         | Toxicity        |
|        |               | Fluoroscopy                                                                        | Diagnosis       |
|        |               | Haptoglobin                                                                        | Toxicity        |
|        |               | Hemoglobin                                                                         | Complication    |
|        |               | Immunoglobulins, quantitative (IgG, IgA, IgM)                                      | Toxicity        |
|        |               | Indirect antiglobulin test                                                         | Toxicity        |
|        |               | Lactate                                                                            | Monitoring      |
|        |               | Lactate dehydrogenase                                                              | Toxicity        |
|        |               | Liver enzymes                                                                      | Toxicity        |
|        |               | Liver function                                                                     | Toxicity        |
|        |               | Microscopy for microorganisms (gram, AFB, iodine, trichrome, india ink, KOH, etc.) | Toxicity        |
|        |               | Microscopy, CBC                                                                    | Toxicity        |

|              |               |                                                                                    |                 |
|--------------|---------------|------------------------------------------------------------------------------------|-----------------|
|              |               | MRI                                                                                | Diagnosis       |
|              |               | Red blood cell typing                                                              | Complication    |
|              |               |                                                                                    | Dosing/Safety   |
|              |               |                                                                                    | Toxicity        |
|              |               | Renal function                                                                     | Toxicity        |
|              |               | Urinalysis                                                                         | Toxicity        |
| Tuberculosis | triage        | Microscopy for microorganisms (gram, AFB, iodine, trichrome, india ink, KOH, etc.) | Diagnosis       |
|              |               | nucleic acid testing, Tuberculosis                                                 | Diagnosis       |
|              |               | X-ray                                                                              | Diagnosis       |
|              | uncomplicated | CBC                                                                                | Toxicity        |
|              |               | Creatinine clearance                                                               | Dosing/Safety   |
|              |               | culture, Tuberculosis                                                              | Diagnosis       |
|              |               |                                                                                    | Monitoring      |
|              |               | G6PD enzyme testing                                                                | Dosing/Safety   |
|              |               | Liver enzymes                                                                      | Toxicity        |
|              |               | Lymphocyte CD4                                                                     | Pathophysiology |
|              |               | Microscopy for microorganisms (gram, AFB, iodine, trichrome, india ink, KOH, etc.) | Monitoring      |
|              |               | nucleic acid testing, Tuberculosis                                                 | DST             |
|              |               | serology, HIV                                                                      | Pathophysiology |
|              |               | TB AST                                                                             | DST             |
|              |               | TB Line probe assays for INH, RIF, 2nd line agents (AST)                           | DST             |
|              |               | TB Lipoarabinomannan, urine (LF-LAM)                                               | Diagnosis       |
|              |               | Uric acid                                                                          | Toxicity        |
|              |               | X-ray                                                                              | Monitoring      |
|              | complicated   | Amylase                                                                            | Toxicity        |
|              |               | Calcium                                                                            | Toxicity        |
|              |               | CBC                                                                                | Toxicity        |
|              |               | Creatinine clearance                                                               | Dosing/Safety   |
|              |               | CSF analysis (microscopy, cell counts, glucose, protein)                           | Diagnosis       |
|              |               | culture, Bacterial                                                                 | DiffDiagnosis   |
|              |               | culture, Fungal                                                                    | DiffDiagnosis   |
|              |               | Electrolytes (Na, K, Cl)                                                           | Toxicity        |
|              |               | G6PD enzyme testing                                                                | Dosing/Safety   |
|              |               | Glucose                                                                            | Toxicity        |
|              |               | Histopathology/Cytopathology                                                       | DiffDiagnosis   |
|              |               | Human chorionic gonadotropin                                                       | Dosing/Safety   |
|              |               | Lactate                                                                            | Toxicity        |
|              |               | Lipase                                                                             | Toxicity        |
|              |               | Liver enzymes                                                                      | Toxicity        |
|              |               | Liver function                                                                     | Dosing/Safety   |
|              |               |                                                                                    | Toxicity        |
|              |               | Magnesium                                                                          | Toxicity        |
|              |               | Renal function                                                                     | Toxicity        |

---

|                                       |               |
|---------------------------------------|---------------|
| therapeutic drug monitoring, Amikacin | Dosing/Safety |
| TSH                                   | Toxicity      |
| Uric acid                             | Toxicity      |

---

Supplementary Table S4. Mapping of diagnostics to diagnostic formats.

| Diagnostic                                               | Diagnostic Format                              |
|----------------------------------------------------------|------------------------------------------------|
| Advanced breast imaging                                  | Advanced breast imaging                        |
| Alkaline phosphatase                                     | Automated chemistry analyzer                   |
| alpha-1 antitrypsin deficiency                           | Automated chemistry analyzer                   |
| Alpha-fetoprotein                                        | Automated immunoassay analyzer                 |
| Amylase                                                  | Automated chemistry analyzer                   |
| anti-Xa assay (heparin)                                  | Automated coagulation analyzer                 |
| antigen, Entamoeba                                       | Automated immunoassay analyzer                 |
| antigen, Legionella (urine)                              | Automated immunoassay analyzer                 |
|                                                          | RDT                                            |
| antigen, Malaria                                         | RDT                                            |
| antigen, Pneumococcus (urine)                            | RDT                                            |
| antigen, Shiga                                           | Automated immunoassay analyzer                 |
|                                                          | RDT                                            |
| Antinuclear antibodies                                   | Indirect immunofluorescence                    |
| Antiphospholipid antibodies                              | Automated coagulation analyzer                 |
| B-type natriuretic peptide                               | Automated immunoassay analyzer                 |
| Bacterial AST                                            | Antimicrobial susceptibility testing           |
| Basic interventional radiology                           | Interventional radiology, basic                |
| Bicarbonate                                              | Benchtop/handheld analyzer                     |
| Biochemical bacterial identification                     | Automated biochemical microbial identification |
| Blood gas                                                | Benchtop/handheld analyzer                     |
| CA 19-9                                                  | Automated immunoassay analyzer                 |
| Calcium                                                  | Automated chemistry analyzer                   |
| Carcinoembryonic antigen (CEA)                           | Automated immunoassay analyzer                 |
| Cardiac marker                                           | Automated immunoassay analyzer                 |
|                                                          | Benchtop/handheld analyzer                     |
| CBC                                                      | Automated hematology analyzer                  |
| Coagulation function (PT, PTT)                           | Automated coagulation analyzer                 |
|                                                          | Benchtop/handheld analyzer                     |
| Complex interventional radiology                         | Interventional radiology, complex              |
| Cooximetry                                               | Benchtop/handheld analyzer                     |
| Creatine kinase                                          | Automated chemistry analyzer                   |
| Creatinine clearance                                     | Automated chemistry analyzer                   |
| CSF analysis (microscopy, cell counts, glucose, protein) | Automated chemistry analyzer                   |
|                                                          | Automated hematology analyzer                  |
|                                                          | Hemocytometer                                  |
| CT scan                                                  | CT scan                                        |
| culture, Bacterial                                       | Culture                                        |
| culture, Fungal                                          | Culture                                        |
| culture, Tuberculosis                                    | TB Culture                                     |
| D-dimer products                                         | Automated immunoassay analyzer                 |
| Direct antiglobulin test                                 | Red blood cell agglutination                   |
| Echocardiogram                                           | Echocardiogram                                 |
| Electrolytes (Na, K, Cl)                                 | Automated chemistry analyzer                   |
| ESR/CRP                                                  | Automated immunoassay analyzer                 |
|                                                          | RDT                                            |
| Fecal Immunochemical Test                                | RDT                                            |
| Fecal leukocytes                                         | Microscopy, with stains                        |
| Fecal occult blood                                       | RDT                                            |
| Fibrinogen                                               | Automated coagulation analyzer                 |
|                                                          | Benchtop/handheld analyzer                     |

|                                                                                    |                                                                      |
|------------------------------------------------------------------------------------|----------------------------------------------------------------------|
| Fluoroscopy                                                                        | Fluoroscopy                                                          |
| G6PD enzyme testing                                                                | RDT<br>Semi-quantitative fluorescent spot test                       |
| Glucose                                                                            | Automated chemistry analyzer<br>Glucometer                           |
| Haptoglobin                                                                        | Automated chemistry analyzer                                         |
| HbA1c                                                                              | Benchtop/handheld analyzer<br>High performance liquid chromatography |
| Hemoglobin                                                                         | Hemoglobinometer                                                     |
| Histopathology/Cytopathology                                                       | Microscopy, with stains                                              |
| HIV RNA quantitative                                                               | Automated nucleic acid analyzer<br>Benchtop/handheld analyzer        |
| Human chorionic gonadotropin                                                       | Automated immunoassay analyzer<br>RDT                                |
| Immunoglobulins, quantitative (IgG, IgA, IgM)                                      | Automated immunoassay analyzer                                       |
| Immunohistopathology/Immunocytopathology                                           | Microscopy, with immunohistochemistry                                |
| Indirect antiglobulin test                                                         | Red blood cell agglutination                                         |
| Iron deficiency panel                                                              | Automated immunoassay analyzer                                       |
| Ketones                                                                            | Automated immunoassay analyzer                                       |
| Lactate                                                                            | Benchtop/handheld analyzer                                           |
| Lactate dehydrogenase                                                              | Automated chemistry analyzer                                         |
| Lipase                                                                             | Automated chemistry analyzer                                         |
| Lipid panel                                                                        | Automated chemistry analyzer                                         |
| Liver enzymes                                                                      | Automated chemistry analyzer                                         |
| Liver function                                                                     | Automated chemistry analyzer                                         |
| Lymphocyte CD4                                                                     | Benchtop/handheld analyzer<br>Flow cytometry                         |
| Magnesium                                                                          | Automated chemistry analyzer                                         |
| Mammography                                                                        | Mammography                                                          |
| Microsatellite instability testing                                                 | Automated nucleic acid analyzer                                      |
| Microscopy for microorganisms (gram, AFB, iodine, trichrome, india ink, KOH, etc.) | Microscopy, with stains                                              |
| Microscopy, CBC                                                                    | Hematology smear microscopy                                          |
| Microscopy, Malaria                                                                | Malaria smear microscopy                                             |
| Microscopy, ova and parasites                                                      | Stool microscopy                                                     |
| molecular, Breast cancer (ER, PR, HER2)                                            | Automated nucleic acid analyzer                                      |
| molecular, Epidermal Growth Factor Receptor                                        | Automated nucleic acid analyzer                                      |
| molecular, Estrogen receptor                                                       | Benchtop/handheld analyzer<br>Microscopy, with immunohistochemistry  |
| molecular, HER2                                                                    | Benchtop/handheld analyzer<br>Microscopy, with immunohistochemistry  |
| MRI                                                                                | MRI                                                                  |
| Nuclear radiology                                                                  | Nuclear radiology                                                    |
| nucleic acid testing, Chlamydia                                                    | Automated nucleic acid analyzer                                      |
| nucleic acid testing, N. gonorrhoeae                                               | Automated nucleic acid analyzer                                      |
| nucleic acid testing, Respiratory virus panel                                      | Automated nucleic acid analyzer                                      |
| nucleic acid testing, Shiga                                                        | Automated nucleic acid analyzer                                      |
| nucleic acid testing, Tuberculosis                                                 | Automated nucleic acid analyzer<br>Benchtop/handheld analyzer        |
| Parathyroid hormone                                                                | Automated immunoassay analyzer                                       |
| PET scan                                                                           | PET scan                                                             |
| Phosphorus                                                                         | Automated chemistry analyzer                                         |
| Qualitative HIV virological (RNA, DNA, or US p24 Ag)                               | Automated nucleic acid analyzer<br>Benchtop/handheld analyzer        |
| Red blood cell typing                                                              | Slide agglutination                                                  |

|                                                          |                                          |
|----------------------------------------------------------|------------------------------------------|
| Renal function                                           | Automated chemistry analyzer             |
| serology, Entamoeba                                      | Automated immunoassay analyzer           |
| serology, HBV                                            | Automated immunoassay analyzer           |
| serology, HCV                                            | Automated immunoassay analyzer           |
|                                                          | RDT                                      |
| serology, HIV                                            | Automated immunoassay analyzer           |
|                                                          | RDT                                      |
| serology, Syphilis (RPR, treponemal)                     | Automated immunoassay analyzer           |
|                                                          | RDT                                      |
| serology, Typhoid fever                                  | ELISA                                    |
| TB AST                                                   | Antimicrobial susceptibility testing, TB |
| TB Line probe assays for INH, RIF, 2nd line agents (AST) | Antimicrobial susceptibility testing, TB |
| TB Lipoarabinomannan, urine (LF-LAM)                     | RDT                                      |
| therapeutic drug monitoring, Amikacin                    | Automated chemistry analyzer             |
| therapeutic drug monitoring, Gentamicin                  | Automated chemistry analyzer             |
| therapeutic drug monitoring, Methotrexate                | Automated chemistry analyzer             |
| TSH                                                      | Automated immunoassay analyzer           |
| Ultrasound                                               | Ultrasound                               |
| Ultrasound, POC                                          | Ultrasound, POC                          |
| Uric acid                                                | Automated chemistry analyzer             |
| Urinalysis                                               | Urine Dipstick                           |
| Urinalysis, microscopic                                  | Urinalysis, microscopic                  |
| Urine albumin/creatinine                                 | Automated chemistry analyzer             |
| Urine protein/creatinine                                 | Automated chemistry analyzer             |
| Vitamin B12                                              | Automated chemistry analyzer             |
| Vitamin D, hydroxy (25)                                  | Automated immunoassay analyzer           |
| X-ray                                                    | X-ray                                    |



Supplementary Table S5. Infrastructural limitations of diagnostic formats.

| Diagnostic Format                              | Tier      |
|------------------------------------------------|-----------|
| Advanced breast imaging                        | Tertiary  |
| Antimicrobial susceptibility testing           | Secondary |
| Antimicrobial susceptibility testing, TB       | Tertiary  |
| Automated biochemical microbial identification | Secondary |
| Automated chemistry analyzer                   | Secondary |
| Automated coagulation analyzer                 | Secondary |
| Automated hematology analyzer                  | Secondary |
| Automated immunoassay analyzer                 | Secondary |
| Automated nucleic acid analyzer                | Tertiary  |
| Benchtop/handheld analyzer                     | Secondary |
| CT scan                                        | Tertiary  |
| Culture                                        | Secondary |
| ELISA                                          | Secondary |
| Echocardiogram                                 | Tertiary  |
| Flow cytometry                                 | Tertiary  |
| Fluoroscopy                                    | Tertiary  |
| Glucometer                                     | Primary   |
| Hematology smear microscopy                    | Secondary |
| Hemocytometer                                  | Secondary |
| Hemoglobinometer                               | Primary   |
| High performance liquid chromatography         | Tertiary  |
| Indirect immunofluorescence                    | Tertiary  |
| Interventional radiology, basic                | Tertiary  |
| Interventional radiology, complex              | Tertiary  |
| MRI                                            | Tertiary  |
| Malaria smear microscopy                       | Primary   |
| Mammography                                    | Tertiary  |
| Microscopy, with immunohistochemistry          | Tertiary  |
| Microscopy, with stains                        | Secondary |
| No instrument                                  | Primary   |
| Nuclear radiology                              | Tertiary  |
| PET scan                                       | Tertiary  |
| RDT                                            | Primary   |
| Red blood cell agglutination                   | Secondary |
| Semi-quantitative fluorescent spot test        | Tertiary  |
| Slide agglutination                            | Secondary |
| Stool microscopy                               | Primary   |
| TB Culture                                     | Tertiary  |
| Ultrasound                                     | Secondary |
| Ultrasound, POC                                | Primary   |
| Urinalysis, microscopic                        | Primary   |
| Urine Dipstick                                 | Primary   |
| X-ray                                          | Secondary |

Supplementary Table S6. Model output of diagnostics by health facility tier.

| Service    | Primary                                                                                   | Secondary                                                                                                                                                                                                                                   | Tertiary                                                                                |
|------------|-------------------------------------------------------------------------------------------|---------------------------------------------------------------------------------------------------------------------------------------------------------------------------------------------------------------------------------------------|-----------------------------------------------------------------------------------------|
| Chemistry  |                                                                                           | Automated chemistry analyzer: alpha-1 antitrypsin deficiency; Amylase*; Liver function*; Calcium; Creatine kinase; Creatinine clearance*; Electrolytes (Na, K, Cl)*; Glucose*; Haptoglobin*; Lactate dehydrogenase*; Lipase*; Lipid panel*; | Automated immunoassay analyzer: Vitamin D, hydroxy (25); Alpha-fetoprotein; CA 19-9;    |
|            | RDT: Human chorionic gonadotropin; ESR/CRP; Fecal Immunochemical Test; Fecal occult blood | Liver enzymes*; Magnesium; Phosphorus*; Renal function*; Uric acid*; Urine albumin/creatinine; Urine protein/creatinine; Vitamin B12                                                                                                        | Carcinoembryonic antigen (CEA); Iron deficiency panel; Ketones; Parathyroid hormone     |
|            | Glucometer: Glucose                                                                       | Automated immunoassay analyzer: B-type natriuretic peptide; Human chorionic gonadotropin*; ESR/CRP*; Cardiac marker; TSH                                                                                                                    | Automated chemistry analyzer: Alkaline phosphatase                                      |
|            |                                                                                           | Benchtop/handheld analyzer: Bicarbonate; Blood gas; Cooximetry*; HbA1c*; Cardiac marker                                                                                                                                                     | High performance liquid chromatography: HbA1c**<br>Benchtop/handheld analyzer: Lactate  |
| Hematology | RDT: G6PD enzyme testing                                                                  | Automated hematology analyzer: CBC*                                                                                                                                                                                                         | Automated chemistry analyzer: CSF analysis (microscopy, cell counts, glucose, protein)  |
|            | Hemoglobinometer: Hemoglobin                                                              | Microscopy, with stains: Fecal leukocytes*                                                                                                                                                                                                  | Automated hematology analyzer: CSF analysis (microscopy, cell counts, glucose, protein) |
|            | Urine Dipstick: Urinalysis                                                                | Hematology smear microscopy: Microscopy, CBC                                                                                                                                                                                                | Hemocytometer: CSF analysis (microscopy, cell counts, glucose, protein)                 |
|            | Urinalysis, microscopic: Urinalysis, microscopic                                          |                                                                                                                                                                                                                                             | Semi-quantitative fluorescent spot test: G6PD enzyme testing**                          |
|            |                                                                                           |                                                                                                                                                                                                                                             |                                                                                         |

|                                                                                                                                 |                   |                                                                                                                                               |                                                                                                                                                                                                                                                                                                                 |
|---------------------------------------------------------------------------------------------------------------------------------|-------------------|-----------------------------------------------------------------------------------------------------------------------------------------------|-----------------------------------------------------------------------------------------------------------------------------------------------------------------------------------------------------------------------------------------------------------------------------------------------------------------|
| Microbiology                                                                                                                    |                   | Biochemical bacterial identification*                                                                                                         | Automated immunoassay analyzer: antigen, Entamoeba; antigen, Legionella (urine); antigen, Shiga; serology, Entamoeba                                                                                                                                                                                            |
|                                                                                                                                 |                   | culture, Bacterial*                                                                                                                           |                                                                                                                                                                                                                                                                                                                 |
|                                                                                                                                 |                   | Bacterial antimicrobial susceptibility testing*                                                                                               | RDT: antigen, Legionella (urine); antigen, Pneumococcus (urine); antigen, Shiga                                                                                                                                                                                                                                 |
|                                                                                                                                 |                   | Microscopy, with stains: Microscopy for microorganisms (gram, AFB, iodine, trichrome, india ink, KOH, etc.)*                                  | culture, Fungal<br>culture, Tuberculosis**                                                                                                                                                                                                                                                                      |
|                                                                                                                                 |                   | Benchtop/handheld analyzer: Qualitative HIV virological (RNA, DNA, or US p24 Ag)*; HIV RNA quantitative*; nucleic acid testing, Tuberculosis* | Automated nucleic acid analyzer: nucleic acid testing, Chlamydia**;<br>Qualitative HIV virological (RNA, DNA, or US p24 Ag)**; HIV RNA quantitative**; nucleic acid testing, N. gonorrhoeae**; nucleic acid testing, Respiratory virus panel; nucleic acid testing, Shiga; nucleic acid testing, Tuberculosis** |
| RDT: antigen, Malaria; serology, HCV; serology, HIV; serology, Syphilis (RPR, treponemal); TB Lipoarabinomannan, urine (LF-LAM) |                   | Automated immunoassay analyzer: serology, HBV*; serology, HCV*; serology, HIV*; serology, Syphilis (RPR, treponemal)*                         |                                                                                                                                                                                                                                                                                                                 |
| Microscopy, Malaria                                                                                                             |                   | ELISA: serology, Typhoid fever*                                                                                                               | Antimicrobial susceptibility testing, TB**                                                                                                                                                                                                                                                                      |
| Microscopy, ova and parasites                                                                                                   |                   |                                                                                                                                               |                                                                                                                                                                                                                                                                                                                 |
| Radiology                                                                                                                       | Ultrasound, POC   |                                                                                                                                               | Advanced breast imaging                                                                                                                                                                                                                                                                                         |
|                                                                                                                                 |                   |                                                                                                                                               | CT scan*                                                                                                                                                                                                                                                                                                        |
|                                                                                                                                 |                   |                                                                                                                                               | Echocardiogram*                                                                                                                                                                                                                                                                                                 |
|                                                                                                                                 |                   |                                                                                                                                               | Fluoroscopy                                                                                                                                                                                                                                                                                                     |
|                                                                                                                                 |                   | Ultrasound                                                                                                                                    | Basic interventional radiology*                                                                                                                                                                                                                                                                                 |
|                                                                                                                                 |                   | X-ray*                                                                                                                                        | Complex interventional radiology*                                                                                                                                                                                                                                                                               |
|                                                                                                                                 |                   |                                                                                                                                               | Mammography**                                                                                                                                                                                                                                                                                                   |
|                                                                                                                                 |                   |                                                                                                                                               | MRI*                                                                                                                                                                                                                                                                                                            |
|                                                                                                                                 | Nuclear radiology |                                                                                                                                               |                                                                                                                                                                                                                                                                                                                 |
|                                                                                                                                 |                   | PET scan                                                                                                                                      |                                                                                                                                                                                                                                                                                                                 |
| Blood bank                                                                                                                      | NA                | Slide agglutination: Red blood cell typing*                                                                                                   | Red blood cell agglutination: Direct antiglobulin test; Indirect antiglobulin test                                                                                                                                                                                                                              |
| Coagulation                                                                                                                     | NA                | Automated coagulation analyzer: Antiphospholipid antibodies; Coagulation function (PT, PTT)                                                   | Automated coagulation analyzer: anti-Xa assay (heparin); Fibrinogen                                                                                                                                                                                                                                             |
|                                                                                                                                 |                   | Benchtop/handheld analyzer: Coagulation function (PT, PTT)                                                                                    | Benchtop/handheld analyzer: Fibrinogen                                                                                                                                                                                                                                                                          |
|                                                                                                                                 |                   | Automated immunoassay analyzer: D-dimer products                                                                                              |                                                                                                                                                                                                                                                                                                                 |
| Flow cytometry                                                                                                                  | NA                | Benchtop/handheld analyzer: Lymphocyte CD4*                                                                                                   | Flow cytometry: Lymphocyte CD4**                                                                                                                                                                                                                                                                                |

|                              |    |    |                                                                                                                                                           |
|------------------------------|----|----|-----------------------------------------------------------------------------------------------------------------------------------------------------------|
| Histopathology               | NA | NA | Microscopy, with immunohistochemistry: Immunohistopathology/Immunocytopathology                                                                           |
|                              |    |    | Microscopy, with stains: Histopathology/Cytopathology                                                                                                     |
| Immunology                   | NA | NA | Indirect immunofluorescence: Antinuclear antibodies**                                                                                                     |
|                              |    |    | Automated immunoassay analyzer: Immunoglobulins, quantitative (IgG, IgA, IgM)                                                                             |
|                              |    |    | Benchtop/handheld analyzer: molecular, Estrogen receptor; molecular, HER2                                                                                 |
| Molecular (non-Microbiology) | NA | NA | Microscopy, with immunohistochemistry: molecular, Estrogen receptor; molecular, HER2                                                                      |
|                              |    |    | Automated nucleic acid analyzer: Microsatellite instability testing; molecular, Breast cancer (ER, PR, HER2); molecular, Epidermal Growth Factor Receptor |
| Toxicology                   | NA | NA | Automated chemistry analyzer: therapeutic drug monitoring, Amikacin; therapeutic drug monitoring, Gentamicin; therapeutic drug monitoring, Methotrexate   |

\* Diagnostic should be placed 1 tier lower but logistical constraints preclude this option. Requests from the lower tier (specimens or referrals) should be performed at this level.

\*\* Diagnostic should be placed 2 tiers lower but logistical constraints preclude this option. Requests from the lower tiers (specimens or referrals) should be performed at this level.

Note: all diagnostics available at lower tier levels are also available at higher tier levels but are unlisted in this table. Tests may be performed in different formats at different tiers or even within the same tier, and placement of all formats may not be necessary.

Supplementary Table S7. Minimum equipment investment and workforce skill needs, by health system tier.

| Equipment needs                                                                                          | Minimum workforce needs                                                                                 |
|----------------------------------------------------------------------------------------------------------|---------------------------------------------------------------------------------------------------------|
| Primary tier                                                                                             |                                                                                                         |
| Microscope (\$2000)                                                                                      | Trained microscopist                                                                                    |
| Glucometer (\$30)                                                                                        | Trained healthcare worker                                                                               |
| Hemoglobinometer (\$300)                                                                                 |                                                                                                         |
| (Where feasible) Point-of-care ultrasound (cost \$6000)                                                  |                                                                                                         |
| Secondary tier (e.g, district-level hospital)                                                            |                                                                                                         |
| Automated chemistry analyzer (\$75,000-smaller, \$110,000-larger)                                        | Laboratory technician (2 years of training)<br>Laboratory technologist (4 years of training)            |
| Automated immunoassay analyzer (\$56,000 – small; \$111,000 larger)                                      | Laboratory director (desirable: PhD) or Pathologist (desirable: medical degree plus specialty training) |
| Automated hematology analyzer (\$110,000)                                                                | Imaging technologist or sonographer (2 years of training)                                               |
| Automated coagulation analyzer (\$104,000)                                                               |                                                                                                         |
| Bacterial culture, liquid: (\$38,500)                                                                    | Radiographer (4 years of training)                                                                      |
| Benchtop analyzers:                                                                                      | Radiologist (desirable: medical degree plus specialty training)                                         |
| - Blood gas (\$10,000)                                                                                   |                                                                                                         |
| - NAAT (\$32,000)                                                                                        |                                                                                                         |
| - CD4 (\$8000)                                                                                           |                                                                                                         |
| - Microscopes (\$2000 each)                                                                              |                                                                                                         |
| - Cart-based Ultrasound including multiple transducers, warranty, service contract (\$125,000-\$150,000) |                                                                                                         |
| - X-ray (\$150,00-\$250,000)                                                                             |                                                                                                         |

**Note:** these include only the equipment costs. Import duties etc add another 25-30%; service contracts not included unless otherwise stated; required building modifications not included
